# Supplementary material for: Bacillus cereus as a Major Cause of Discarded Pasteurized Human Banked Milk: A Single Human Milk Bank Experience
Source: MDPI journal article supplement (doi:10.3390/foods10122955), 2021-12-01
Supplement: s1 [file s1]

**Table S1. Suppl.** Temperatures in April, Klementinum, Prague

| Year | Mean (°C) | Deviation from norm (°C)* | Maximum (°C) | Minimum (°C) |
|------|-----------|---------------------------|--------------|--------------|
| 2017 | 10.0      | + 0.4                     | 16.0         | 3.5          |
| 2018 | 15.6      | + 6.1                     | 21.3         | 6.7          |
| 2019 | 12.4      | + 2.6                     | 20.5         | 4.6          |
| 2020 | 12.6      | + 2.8                     | 18.7         | 4.0          |

**Table S2. Suppl.** Temperatures in May 2017 - 2020, Klementinum, Prague

| Year | Mean temperature of the month °C | Deviation from norm °C* | Maximal mean day temperature °C | Minimal mean day temperature °C |
|------|----------------------------------|-------------------------|---------------------------------|---------------------------------|
| 2017 | 17.1                             | +2.3                    | 25.3                            | 6.9                             |
| 2018 | 19.6                             | +3.7                    | 26.0                            | 13.3                            |
| 2019 | 13.8                             | -2.1                    | 20.0                            | 5.9                             |
| 2020 | 14.3                             | -1.6                    | 18.9                            | 7.8                             |

**Table S3. Suppl.** Temperatures in September 2017 – 2020, Klementinum, Prague

| Year | Mean (°C) | Deviation from norm (°C)* | Maximum (°C) | Minimum (°C) |
|------|-----------|---------------------------|--------------|--------------|
| 2017 | 14.8      | - 0.4                     | 18.0         | 11.5         |
| 2018 | 17.5      | + 2.3                     | 22.7         | 9.4          |
| 2019 | 16.4      | + 0.8                     | 22.0         | 11.5         |
| 2020 | 17.3      | + 1.7                     | 23.9         | 8.6          |

\*Deviation from norm calculated from mean temperatures in the period 1981- 2010. Positive deviations are marked red.
